# Supplementary material for: Physical and Biological Controls on the Carbonate Chemistry of Coral Reef Waters: Effects of Metabolism, Wave Forcing, Sea Level, and Geomorphology
Source: PLoS One. 2013 Jan 9;8(1):e53303. doi: 10.1371/journal.pone.0053303 (PMC3541250; doi:10.1371/journal.pone.0053303)
Supplement: Appendix S1 — Derivation of wave setup formulation. (DOC) [file pone.0053303.s001.doc]

### Appendix S1: Wave setup

Gourlay and Colleter 2005 [1] developed an analytical formulation to describe wave-driven setup at the reef crest as a function of incident wave power (proportional to ) which can be approximated as

where  is the empirical reef profile factor, is the offshore wave height, *T* is the wave period,  is the total depth of the reef flat equal to the sum of the reef flat depth and the reef flat setup , is the cross-reef transport per width of reef, and *g* is the rate of gravitational acceleration. is the wave power transmission parameter defined as

assuming that wave reflection off the reef front is negligible and is the maximum height of waves relative to depth on the reef flat. Gourlay and Colleter 2005 found that  = 0.8 for steep-faced reefs, however, this value can be lower for reefs with more gentle forereef slopes [2]. Measurements across many reefs reported in the literature indicate that for most reef  is ~1.5 m,  is ~1.5 m and are ~0.2 m-2 s (Table 1). Assuming these characteristics and a wave period of ~10 s (a value that is intermediate to locally generated wind waves 5 to 8 s and oceanic swell 12 to 16 s), we can simplify Eq. 1 to

while introducing an error of only less than ~1 cm. Similarly, it is easy to show that can be simplified to

while introducing less than 1% error. In fact, for the typical reef conditions listed above, = 0.97 or ≈ 1. Thus, given typical reef morphology and wave conditions, can be estimated by the following with an error of just ~1 cm

1. Gourlay MR, Colleter G (2005) Wave-generated flow on coral reefs-an analysis for two-dimensional horizontal reef-tops with steep faces. Coastal Eng 52: 353-387.

2. Lowe RJ, Falter JL, Monismith SG, Atkinson MJ (2009) Numerical model of wave transformation and circulation within a barrier reef-lagoon system: Kaneohe Bay, Hawaii. J Geophys Res 114.
